# Supplementary material
Source: ML conference proceedings conference paper supplement (https://aclanthology.org/2026.codi-1.27)

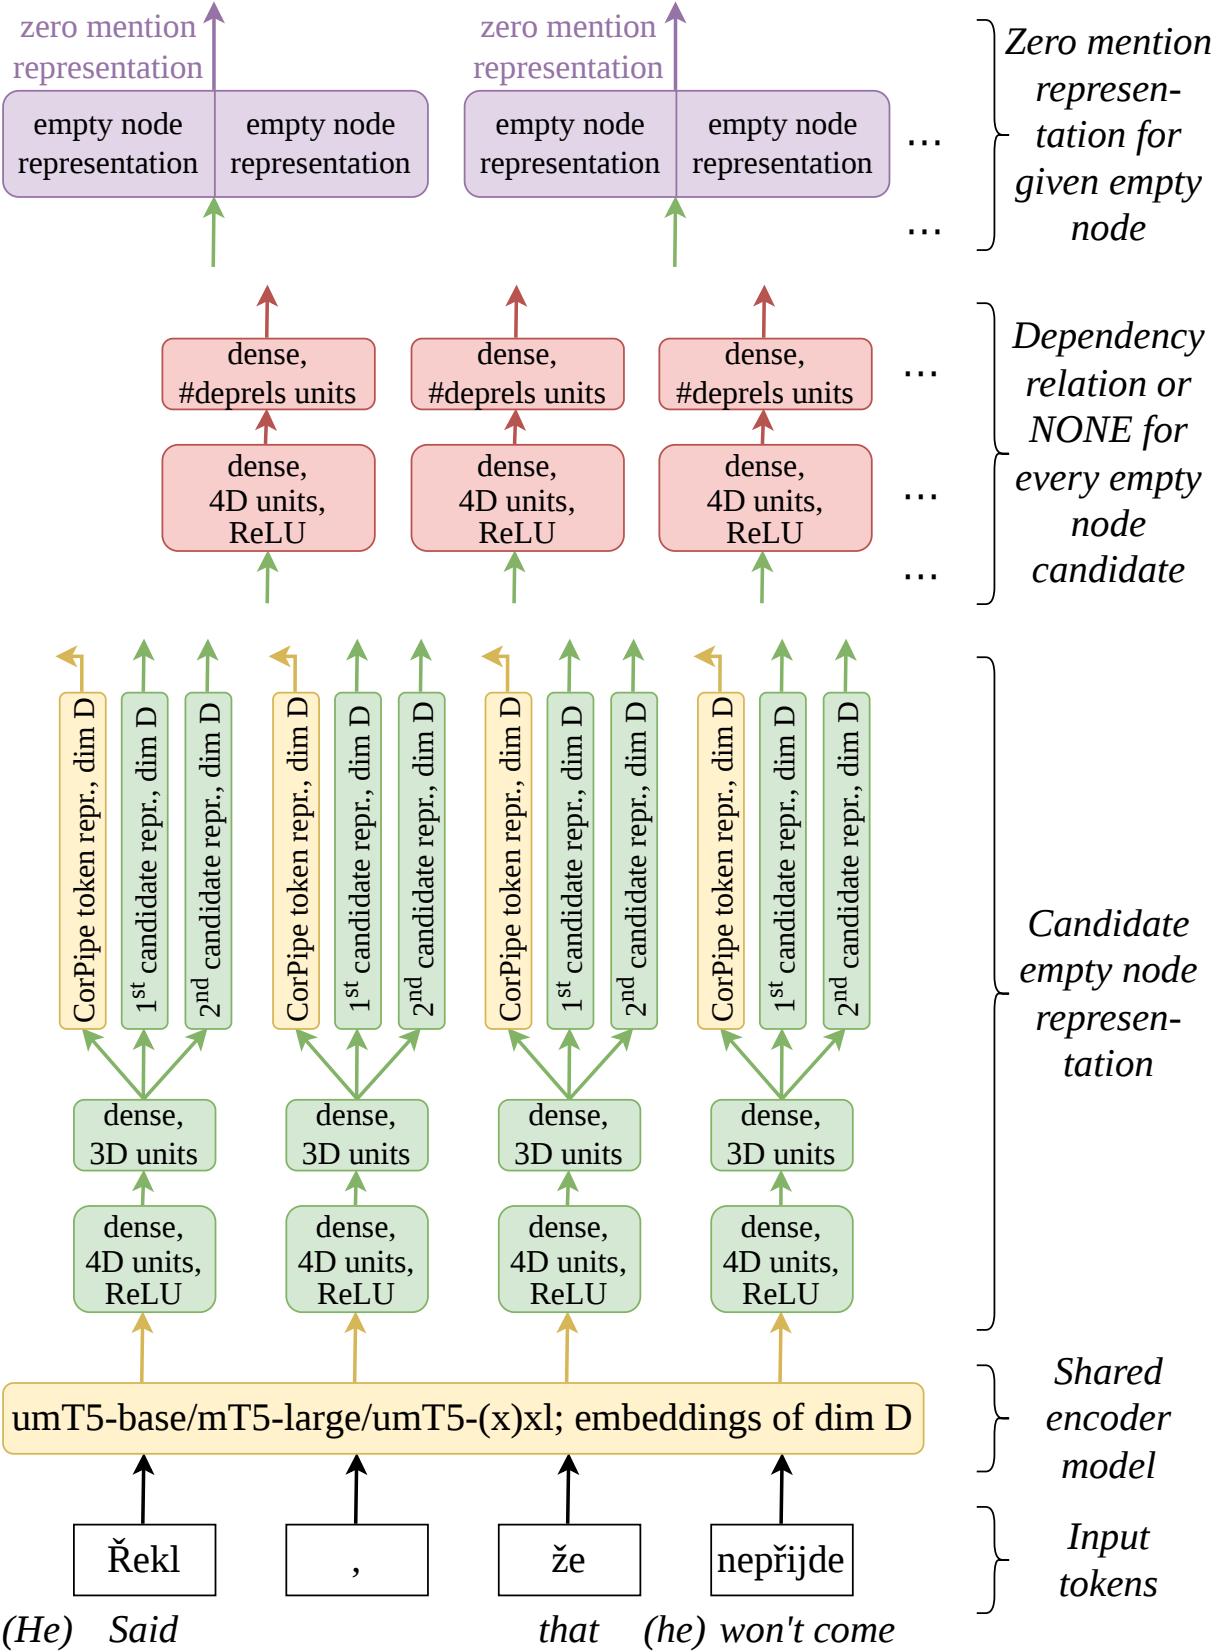

Supplement: SupplementaryMaterial [file corpipe26_1stage.pdf › corpipe26_1stage.pdf]

# Coreference Linking

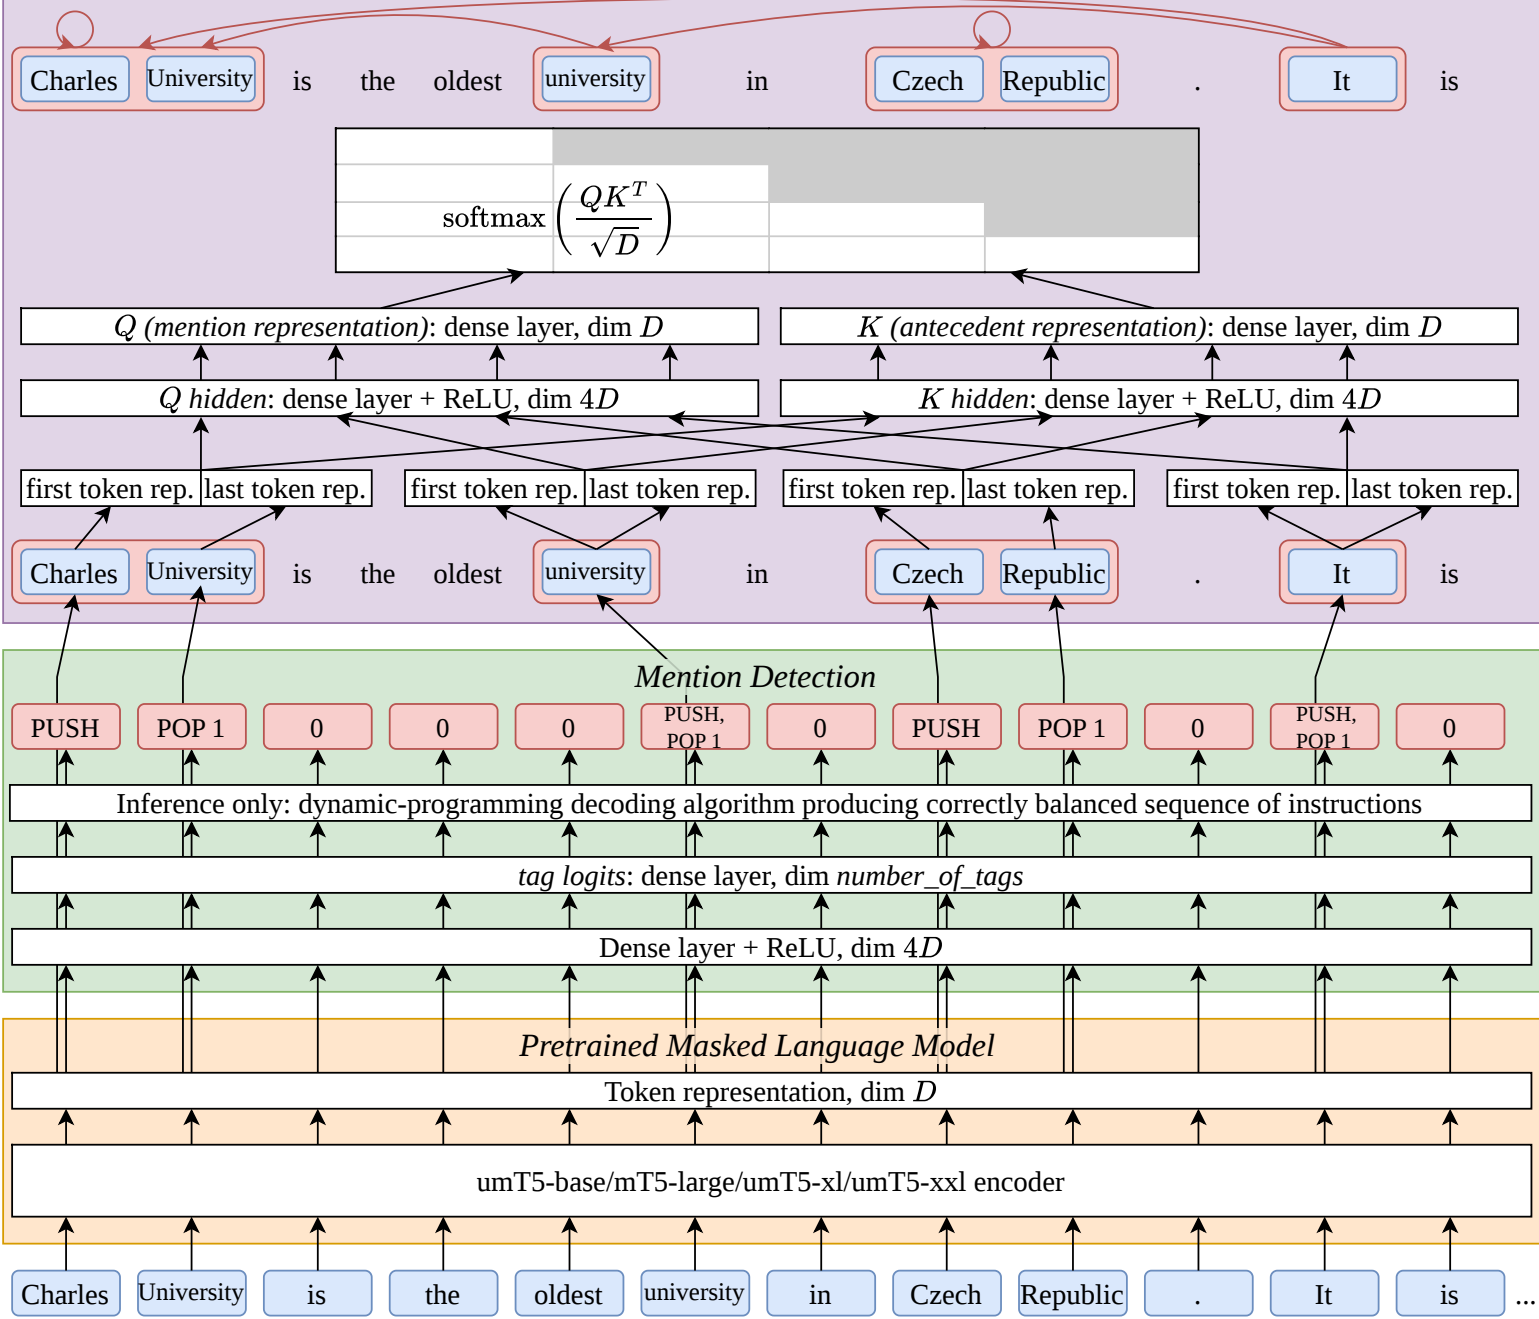

Supplement: SupplementaryMaterial [file corpipe26_architecture.pdf › corpipe26_architecture.pdf]

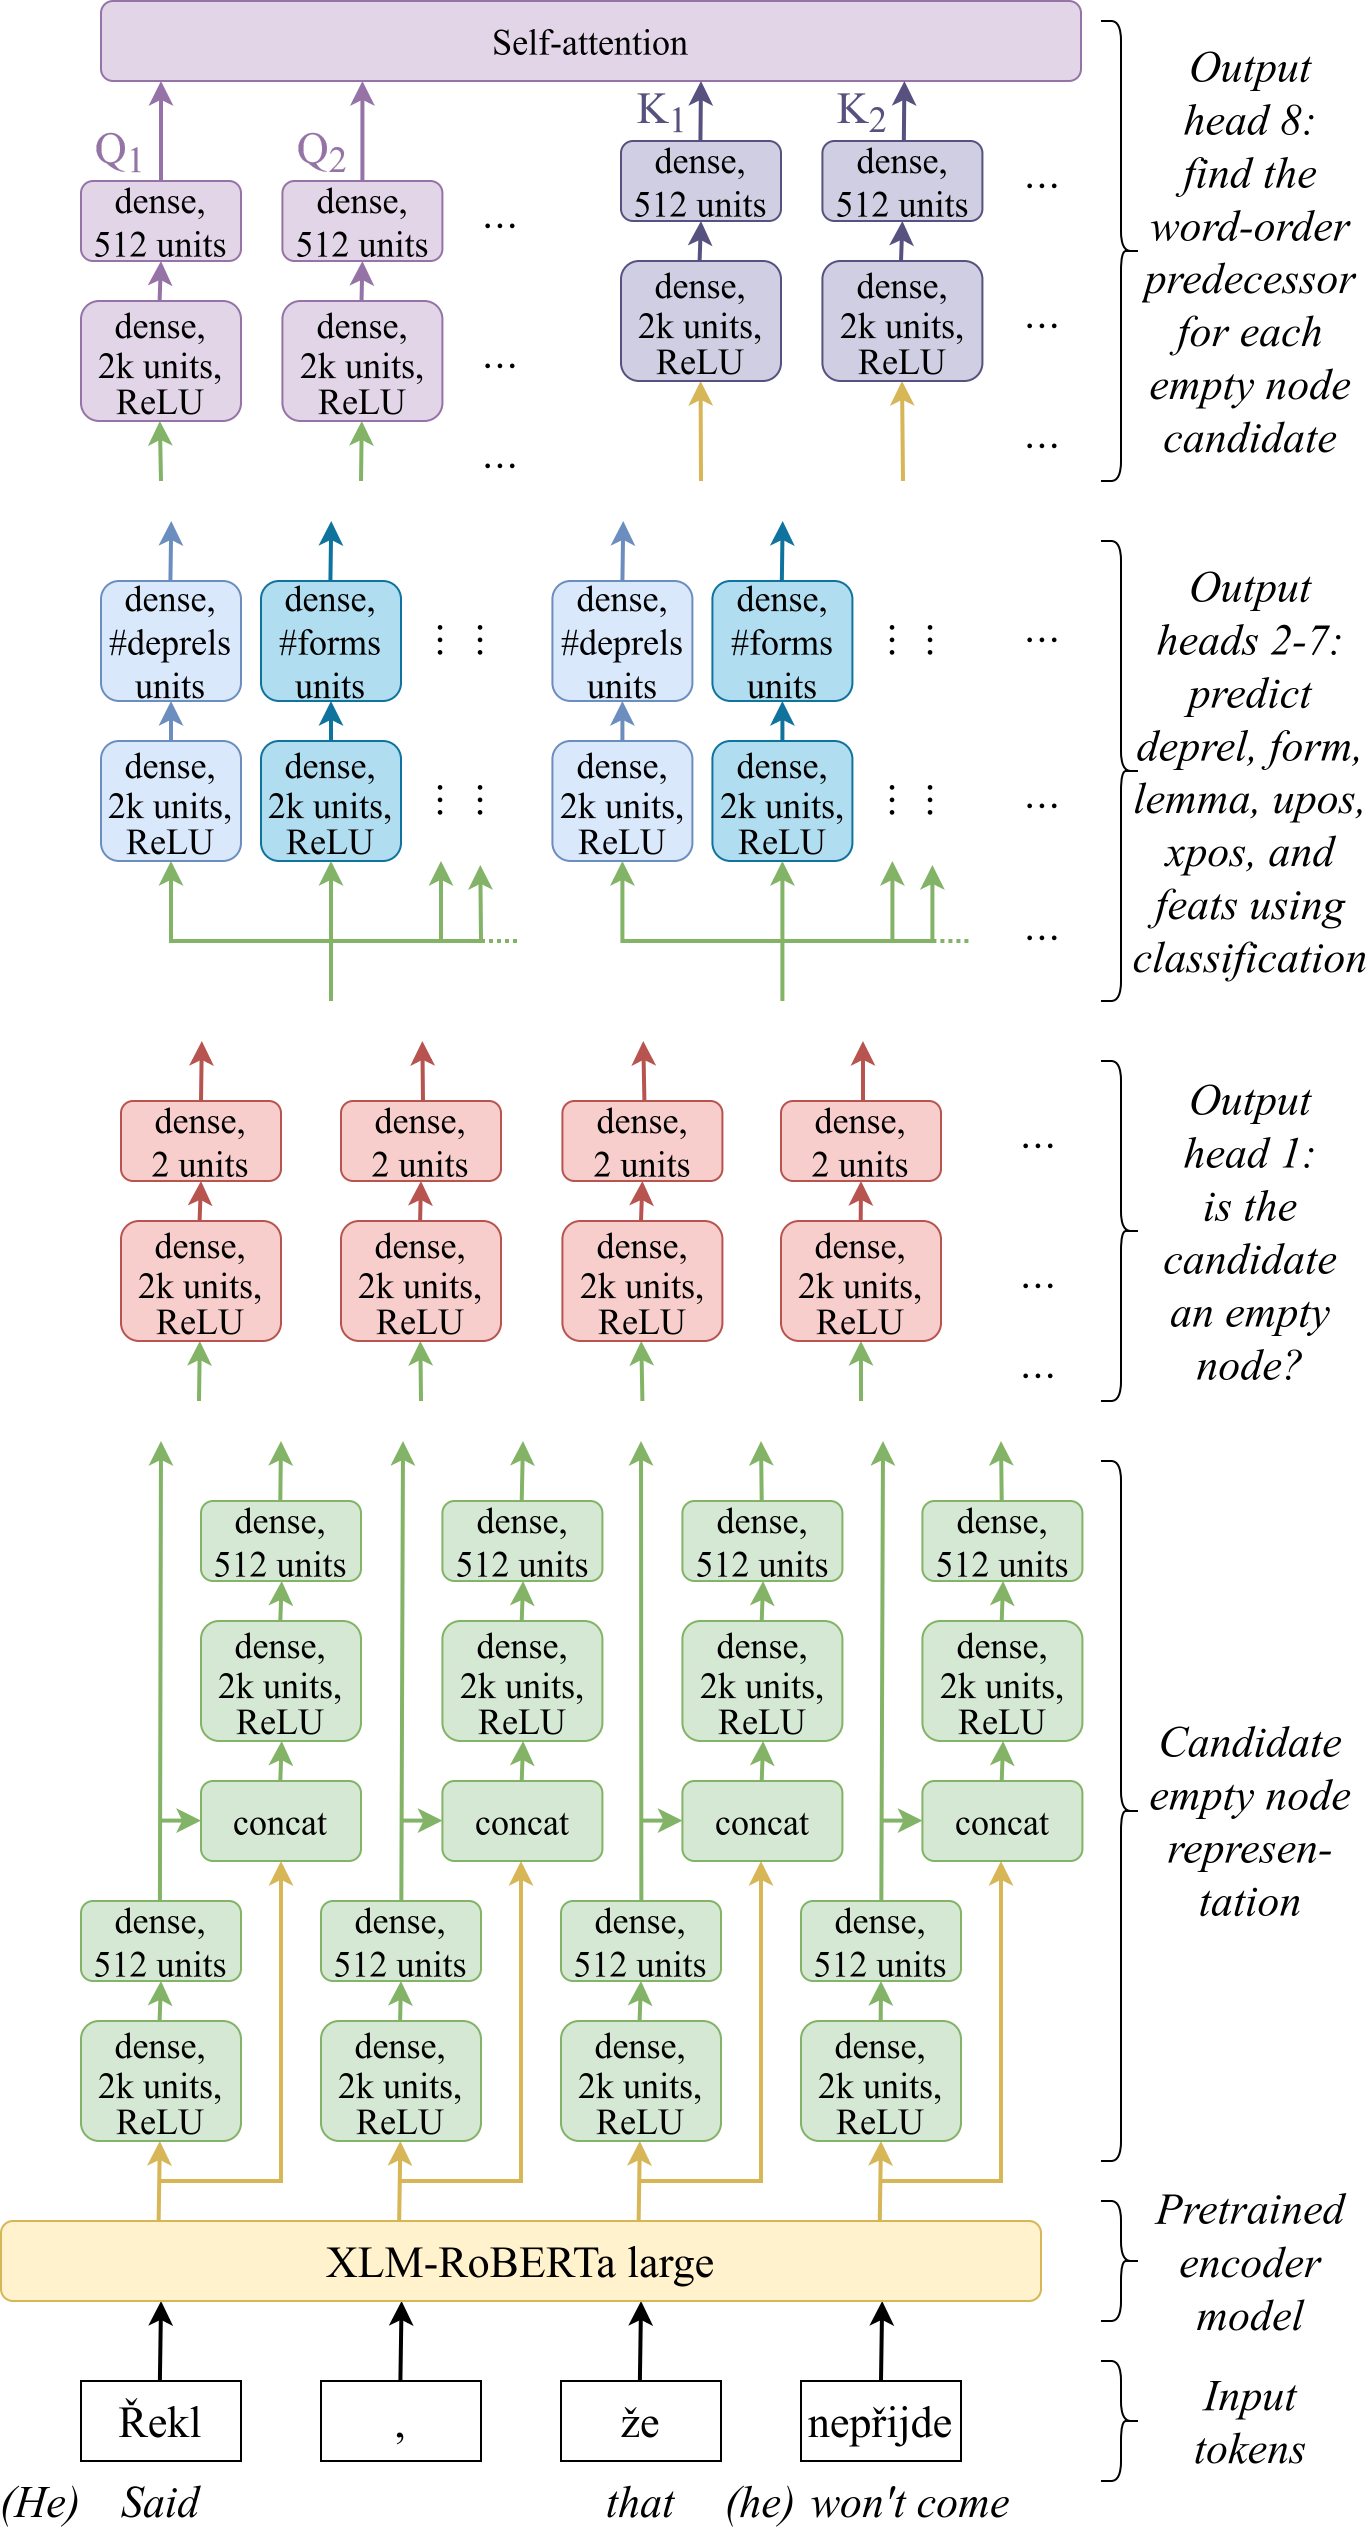

Supplement: SupplementaryMaterial [file crac26_empty_nodes_baseline.pdf › crac26_empty_nodes_baseline.pdf]
